# Supplementary material
Source: publisher figshare collection journal article supplement (https://acs.figshare.com/ndownloader/files/12860138)
Supplement: Supplementary file 1 [file 12860138]

## **Supporting Information**

### **A Highly Bendable and Durable Transparent Electromagnetic Interference Shielding Film Prepared by Wet Sintering of Silver Nanowires**

Dong Gyu Kim,<sup>†,§</sup> Jong Han Choi,<sup>†,||</sup> Duck- Kyun Choi,<sup>§</sup> and Sang Woo Kim<sup>\*†,‡</sup>

<sup>†</sup>Clean Energy Research Center, Korea Institute of Science and Technology (KIST), Seoul 02792, Republic of Korea

<sup>‡</sup> Division of Energy Environment Technology, KIST school, University of Science and Technology (UST), Seoul 02792, Republic of Korea

<sup>§</sup>Division of Materials Science and Engineering, Hanyang University, Seoul 04763, Republic of Korea

<sup>||</sup>Department of Chemical and Biological Engineering, Korea University, Seoul, 02841, Republic of Korea

#### **AUTHOR INFORMATION**

##### **Corresponding Author**

\*E-mail: swkim@kist.re.kr. Phone: +82-2-958-5526. Fax: +82-2-5219



## **Supporting Information**

Figures S1, S2, and S3 provided in the Supporting Information document (.pdf file).

### **List of Supplementary Figures**

Supplementary **Figure S1**. Reflectance, absorbance, and transmittance of Ag NW EMI shielding films ( $T = 90.3\%$ ; at 550 nm).

Supplementary **Figure S2**. Image of the radius of curvature (ROC) bending tester; a schematic of ROC.

Supplementary **Figure S3**. Total EMI SE of A/RGO/SANW EMI shielding film at 8–18 GHz.

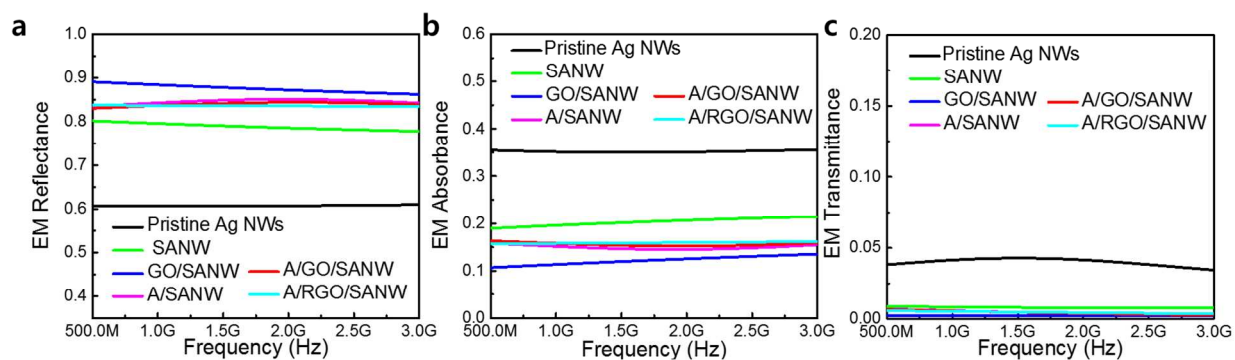

**Figure S1.** Reflectance, absorbance, and transmittance of Ag NW EMI shielding films ( $T = 90.3\%$ ; at 550 nm). (a) EM Reflectance, (b) EM absorbance, and (c) EM transmittance.

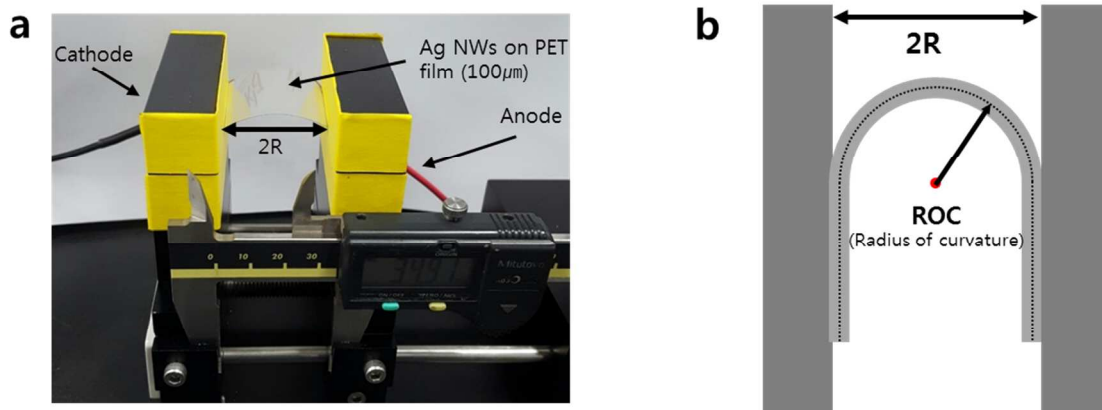

**Figure S2.** Image of the radius of curvature (ROC) bending tester (a); a schematic of ROC (b).

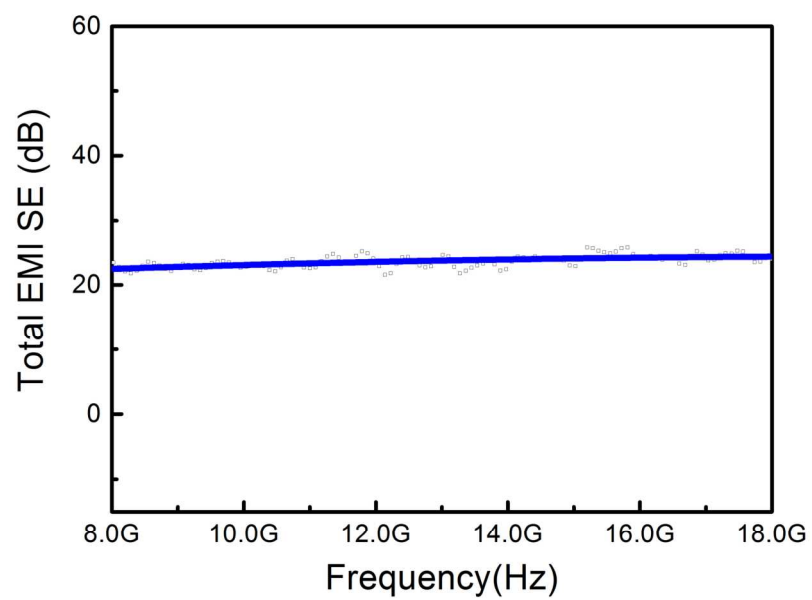

**Figure S3.** Total EMI SE of A/RGO/SANW EMI shielding film at 8–18 GHz.
